# Supplementary material
Source: publisher figshare collection journal article supplement (https://aacr.figshare.com/articles/dataset/_/23822929)

A.

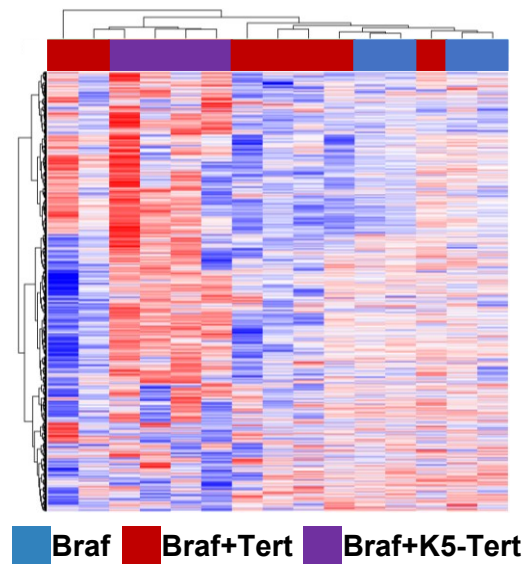

C.

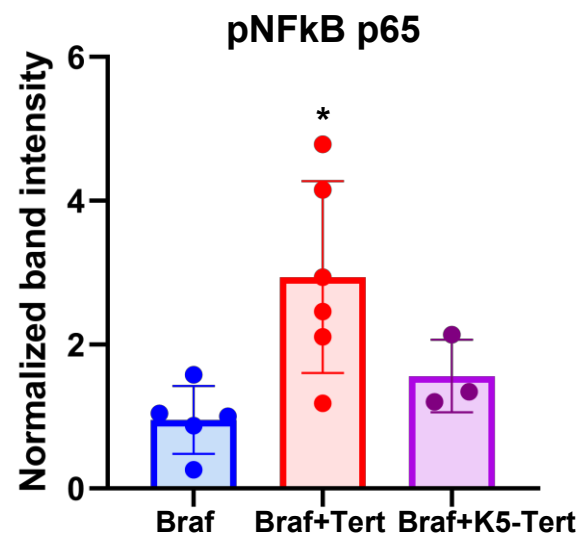

D.

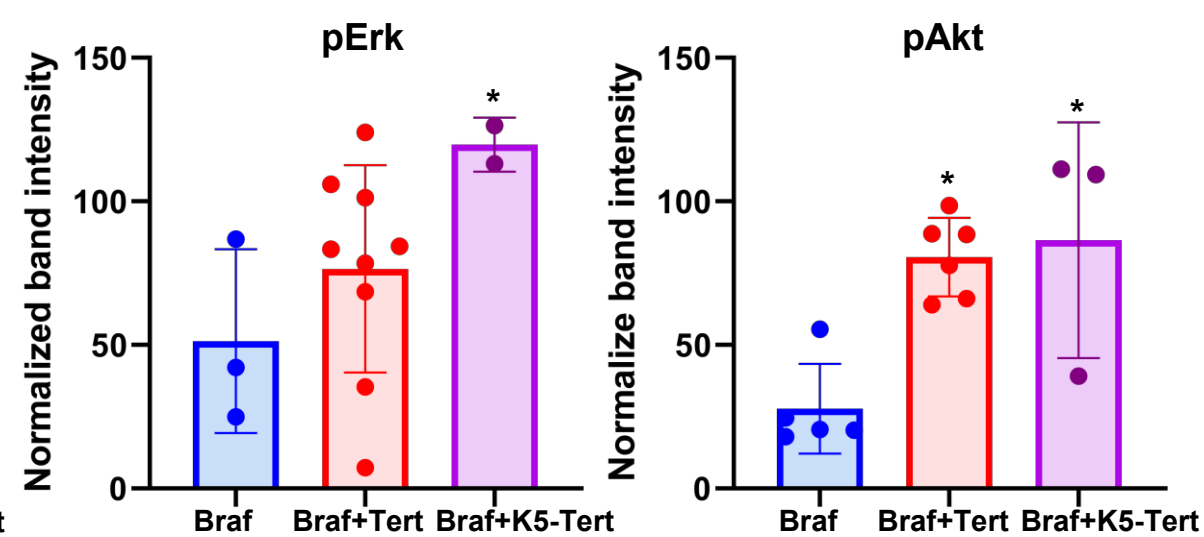

B.

## Braf vs. Braf+Tert, KEGG Up terms

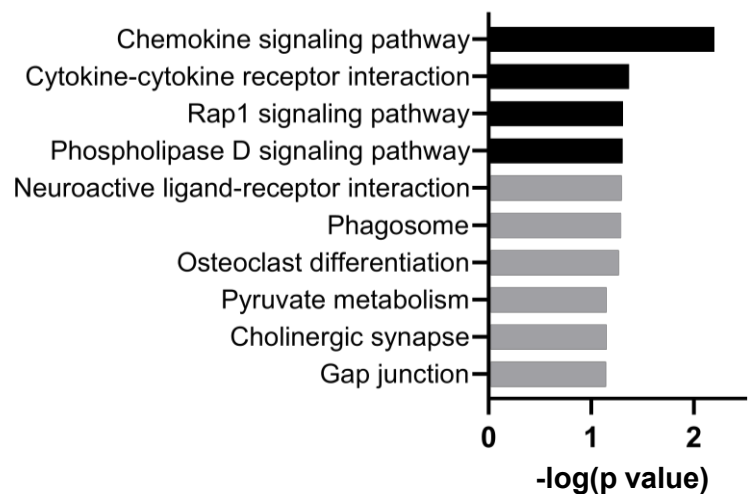

E.

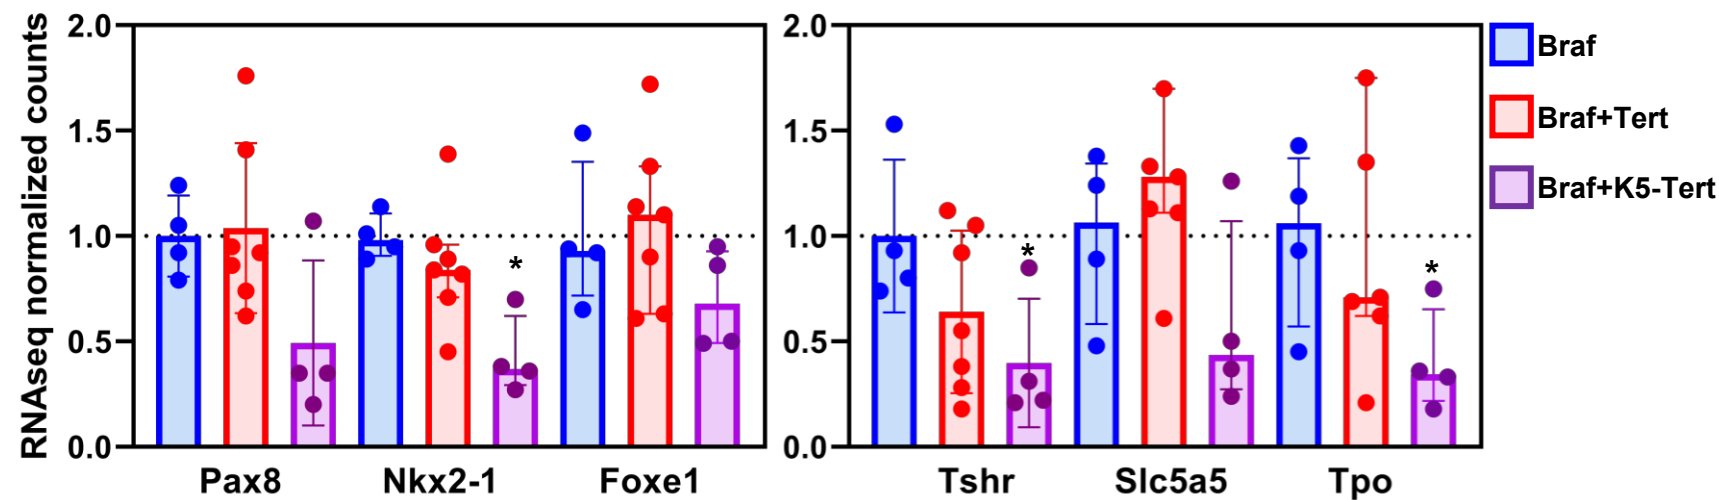

Supplement: Supplementary file 1 [file 41803168]
